# Supplementary material for: Insights into the molecular evolution of oxytocin receptor ligand binding
Source: Oxford University Press journal article supplement (doi:10.1042/bst20120256), 2013-01-29
Supplement: bst0410197add.pdf [file bst0410197add.pdf]

## SUPPLEMENTARY ONLINE DATA

## Insights into the molecular evolution of oxytocin receptor ligand binding

Johannes Koebach\*, Thomas Stockner\*, Christian Bergmayr\*, Markus Muttenthaler† and Christian W. Gruber\*<sup>1</sup>

\*Medical University of Vienna, Center for Physiology and Pharmacology, Schwarzspanierstr. 17, A-1090 Vienna, Austria, and †Departments of Chemistry and Cell Biology, The Scripps Research Institute, 10550 North Torrey Pines Road, La Jolla, CA 92037, U.S.A.

Table S1 | Insights into the molecular evolution of OTR ligand binding

N/OFG, nociceptin/orphanin FQ.

| Receptor                             | PDB code | Residue number <sup>a</sup> |    |    |    |    |     |     |     |     |     |     |     |     |     |     |     |     |     |     |     |     |     |     |     |   |   |
|--------------------------------------|----------|-----------------------------|----|----|----|----|-----|-----|-----|-----|-----|-----|-----|-----|-----|-----|-----|-----|-----|-----|-----|-----|-----|-----|-----|---|---|
|                                      |          | 88                          | 91 | 95 | 98 | 99 | 103 | 116 | 119 | 123 | 124 | 188 | 200 | 204 | 205 | 208 | 209 | 288 | 291 | 292 | 295 | 298 | 308 | 311 | 315 |   |   |
| Human                                |          |                             |    |    |    |    |     |     |     |     |     |     |     |     |     |     |     |     |     |     |     |     |     |     |     |   |   |
| $\beta_2$ -adrenergic                | 2RH1     |                             |    |    |    |    |     |     | x   | x   |     |     | x   | x   | x   | x   |     | x   | x   | x   | x   |     |     |     |     | x |   |
|                                      | 3D45     |                             |    |    |    |    |     |     | x   | x   |     |     | x   | x   |     | x   |     | x   | x   | x   | x   |     |     |     |     | x |   |
|                                      | 35N6     | x                           |    |    |    |    |     | x   | x   | x   |     | x   | x   | x   |     | x   |     | x   | x   | x   | x   |     |     |     | x   | x |   |
|                                      | 3P0G     |                             |    |    |    |    |     | x   | x   | x   |     | x   | x   | x   |     | x   |     | x   | x   | x   | x   |     | x   |     | x   | x |   |
|                                      | 3PDS     |                             |    |    | x  |    | x   | x   | x   | x   |     | x   | x   | x   |     | x   |     | x   | x   | x   | x   |     |     |     | x   | x |   |
| Turkey                               |          |                             |    |    |    |    |     |     |     |     |     |     |     |     |     |     |     |     |     |     |     |     |     |     |     |   |   |
| $\beta_1$ -adrenergic                | 2Y00     |                             |    |    |    |    |     |     | x   | x   |     |     |     | x   |     | x   |     | x   | x   | x   | x   |     |     |     |     | x |   |
|                                      | 2Y04     |                             |    |    |    |    |     |     | x   | x   |     |     |     | x   |     | x   |     | x   | x   | x   | x   |     |     |     |     | x |   |
|                                      | 2VT4     |                             |    |    |    |    |     |     | x   | x   |     | x   | x   | x   |     | x   |     | x   | x   | x   |     |     |     |     | x   | x |   |
| Human $A_{2A}$ adenosine             | 3EML     |                             |    |    |    |    |     |     | x   | x   |     |     |     | x   |     | x   |     | x   | x   | x   | x   |     |     |     |     | x |   |
|                                      | 3PWH     |                             |    |    |    |    |     |     | x   |     |     | x   |     |     |     | x   |     | x   | x   | x   | x   |     | x   | x   |     | x |   |
| Bovine rhodopsin                     | 3OAX     |                             |    |    |    |    |     |     | x   | x   |     |     |     | x   |     | x   |     | x   | x   | x   | x   |     | x   | x   |     | x |   |
| CXCR4 chemokine                      | 3OE6     | x                           | x  | x  | x  | x  |     |     | x   |     |     | x   |     |     |     |     |     |     | x   |     | x   |     |     |     | x   | x |   |
| Human dopamine $D_3$                 | 3PBL     |                             |    |    |    |    |     |     | x   | x   |     |     |     | x   |     | x   |     | x   | x   | x   | x   |     |     |     |     | x |   |
| Human $M_2$ muscarinic acetylcholine | 3U0N     |                             |    | x  | x  | x  |     |     |     |     | x   | x   |     |     |     | x   | x   | x   | x   | x   | x   |     |     |     |     |   |   |
| Sphingosine 1-phosphate              | 3V2Y     |                             |    |    |    |    |     |     | x   | x   |     |     |     | x   |     | x   |     | x   | x   | x   | x   |     |     |     |     | x | x |
|                                      | 3V2W     | x                           | x  | x  | x  |    |     |     | x   | x   |     |     |     | x   |     | x   |     | x   | x   |     | x   |     |     |     |     | x | x |
| $M_3$ muscarinic acetylcholine       | 4DAJ     | x                           | x  | x  | x  |    |     |     | x   | x   | x   |     |     | x   |     | x   | x   | x   | x   | x   | x   |     |     |     |     |   |   |
| Human $\kappa$ -opioid               | 4DJH     |                             |    |    |    |    |     | x   | x   | x   |     |     | x   | x   | x   | x   | x   | x   | x   | x   | x   |     |     |     |     | x |   |
| Mouse $\mu$ -opioid                  | 4DKL     |                             |    |    |    |    |     |     | x   | x   |     |     |     | x   | x   |     |     | x   | x   | x   | x   |     | x   |     |     | x | x |
| Human N/OFG opioid                   | 4EA3     | x                           | x  | x  |    |    |     |     | x   | x   |     |     |     | x   |     | x   |     | x   | x   | x   | x   |     |     |     |     | x | x |
| Human $\delta$ -opioid               | 4EJ4     |                             |    |    |    |    |     |     | x   | x   |     |     | x   | x   | x   | x   |     | x   | x   | x   | x   |     | x   |     |     | x | x |
| Human histamine $H_1$                | 3RZE     | x                           | x  | x  | x  |    |     |     | x   |     |     |     |     |     |     |     |     |     | x   | x   | x   |     |     |     |     | x | x |

<sup>a</sup>Residue numbers are listed for the human OTR receptor sequence SwissProt P30559 and correspond to equivalent positions (by alignment) of other receptors.Received 26 September 2012  
doi:10.1042/BST20120256<sup>1</sup>To whom correspondence should be addressed (email christian.w.gruber@meduniwien.ac.at).
